# Supplementary material for: A computational study of the reactions of a β-diketiminatoaluminium(i) complex with the hydrogen atom and the electron
Source: Royal Society of Chemistry journal article supplement (doi:10.1039/b414665d), 2005-01-01
Supplement: b414665d.pdf [file b414665d.pdf]

**A Computational Study of the Reactions of a  $\beta$ -  
Diketiminatoaluminium (I) Complex with the Hydrogen Atom and  
the Electron**

---

**Iain McKenzie, Paul W. Percival, and Jason A. C. Clyburne\***

*<sup>a</sup> Department of Chemistry, Simon Fraser University, 8888 University Drive, Burnaby BC V5A 1S6, Canada. E-mail: clyburne@sfu.ca*

Supporting Information

## Aluminum carbene analogue (2)

### Cartesian coordinates

| Center<br>Number | Atomic<br>Number | Atomic<br>Type | Coordinates (Angstroms) |           |           |
|------------------|------------------|----------------|-------------------------|-----------|-----------|
|                  |                  |                | X                       | Y         | Z         |
| 1                | 13               | 0              | 0.000000                | -1.925846 | -0.000003 |
| 2                | 7                | 0              | -1.413868               | -0.527439 | 0.000000  |
| 3                | 7                | 0              | 1.413868                | -0.527439 | 0.000001  |
| 4                | 6                | 0              | -1.260017               | 0.801968  | 0.000000  |
| 5                | 6                | 0              | 0.000000                | 1.425720  | -0.000001 |
| 6                | 6                | 0              | 1.260017                | 0.801968  | 0.000000  |
| 7                | 6                | 0              | -2.476072               | 1.705766  | 0.000001  |
| 8                | 6                | 0              | 2.476072                | 1.705766  | -0.000001 |
| 9                | 6                | 0              | -2.776219               | -1.075501 | 0.000002  |
| 10               | 6                | 0              | 2.776218                | -1.075502 | 0.000003  |
| 11               | 1                | 0              | 0.000000                | 2.508584  | -0.000002 |
| 12               | 1                | 0              | -2.183464               | 2.756903  | -0.000003 |
| 13               | 1                | 0              | -3.102285               | 1.523994  | 0.880607  |
| 14               | 1                | 0              | -3.102291               | 1.523989  | -0.880601 |
| 15               | 1                | 0              | 2.183464                | 2.756903  | 0.000001  |
| 16               | 1                | 0              | 3.102287                | 1.523992  | -0.880606 |
| 17               | 1                | 0              | 3.102290                | 1.523991  | 0.880601  |
| 18               | 1                | 0              | -3.344785               | -0.776051 | -0.889284 |
| 19               | 1                | 0              | -3.344785               | -0.776046 | 0.889285  |
| 20               | 1                | 0              | -2.707747               | -2.167556 | 0.000005  |
| 21               | 1                | 0              | 3.344783                | -0.776051 | 0.889289  |
| 22               | 1                | 0              | 3.344787                | -0.776049 | -0.889280 |
| 23               | 1                | 0              | 2.707745                | -2.167557 | 0.000002  |

N-N= 5.941728538055D+02 E-N=-2.656260499170D+03 KE= 6.217978046777D+02  
1\1\GINC-B060\FOpt\UB3LYP\6-31++G(d,p)\C7H13Al1N2\IMCKENZI\23-Mar-2003  
\0\#\ UB3LYP/6-31++G(D,P) OPT(TIGHT) FORMCHECK=(ALL) POP=(MINIMAL)\Al  
uminum carbene analogue.\0,1\Al,0.0006921695,-1.9236697353,-0.0915346  
158\N,-1.4136127036,-0.5279985639,-0.0114806955\N,1.4139917054,-0.5256  
880016,-0.0386549487\C,-1.2602465024,0.8000318154,0.0502246812\C,-0.00  
05124122,1.4241091219,0.0677606486\C,1.2596701779,0.8020910275,0.02600  
70727\C,-2.476569645,1.7018147072,0.1048678962\C,2.4753438546,1.705861  
1189,0.0572757019\C,-2.7757031402,-1.0765540893,-0.0244352043\C,2.7764  
759166,-1.0720178631,-0.077793526\H,-0.0009017839,2.5057487988,0.11922  
65136\H,-2.1843529259,2.7520035377,0.1520107763\H,-3.0942015919,1.4778  
883616,0.981816866\H,-3.1111816223,1.5615801716,-0.7773189277\H,2.1823  
717984,2.7555716191,0.1100476677\H,3.0931072819,1.5666532273,-0.836950  
9957\H,3.1100856227,1.4829549387,0.9221845084\H,-3.3529214196,-0.73564  
62957,-0.8929784478\H,-3.3357797804,-0.8201632549,0.8834986805\H,-2.70  
68415176,-2.1673191302,-0.0769935312\H,3.3534773186,-0.8147018378,0.81  
92148912\H,3.3363392944,-0.7301780657,-0.9572620325\H,2.708398596,-2.1  
628945835,-0.1290400763\Version=x86-Linux-G98RevA.11.3\HF=-626.573965  
1\S2=0.\S2-1=0.\S2A=0.\RMSD=5.714e-09\RMSF=2.418e-08\Dipole=-0.0005831  
,1.6209088,0.0771289\PG=C01 [X(C7H13Al1N2)]\@

## 2-H1

### Cartesian coordinates

| Center<br>Number | Atomic<br>Number | Atomic<br>Type | Coordinates (Angstroms) |           |           |
|------------------|------------------|----------------|-------------------------|-----------|-----------|
|                  |                  |                | X                       | Y         | Z         |
| 1                | 13               | 0              | -0.000001               | -1.618132 | -0.000039 |
| 2                | 7                | 0              | 1.465644                | -0.577027 | -0.007624 |
| 3                | 7                | 0              | -1.465647               | -0.577029 | 0.007607  |
| 4                | 1                | 0              | 0.000004                | -3.190094 | -0.000092 |
| 5                | 6                | 0              | 1.279345                | 0.831997  | 0.018169  |
| 6                | 6                | 0              | -1.279346               | 0.831996  | -0.018156 |
| 7                | 6                | 0              | 2.822001                | -1.109010 | -0.117759 |
| 8                | 6                | 0              | -2.821998               | -1.109008 | 0.117843  |
| 9                | 6                | 0              | 0.000000                | 1.405890  | 0.000010  |
| 10               | 6                | 0              | 2.495638                | 1.713600  | 0.130330  |
| 11               | 6                | 0              | -2.495637               | 1.713599  | -0.130355 |
| 12               | 1                | 0              | 3.467145                | -0.786719 | 0.709414  |
| 13               | 1                | 0              | 3.309310                | -0.817666 | -1.059083 |
| 14               | 1                | 0              | 2.785595                | -2.203261 | -0.094525 |
| 15               | 1                | 0              | -3.467214               | -0.786687 | -0.709261 |
| 16               | 1                | 0              | -3.309220               | -0.817691 | 1.059221  |
| 17               | 1                | 0              | -2.785600               | -2.203259 | 0.094568  |
| 18               | 1                | 0              | -0.000002               | 2.492097  | 0.000011  |
| 19               | 1                | 0              | 2.198759                | 2.764413  | 0.091814  |
| 20               | 1                | 0              | 3.221112                | 1.548294  | -0.677449 |
| 21               | 1                | 0              | 3.038716                | 1.563800  | 1.076345  |
| 22               | 1                | 0              | -2.198763               | 2.764412  | -0.091794 |
| 23               | 1                | 0              | -3.221156               | 1.548270  | 0.677378  |
| 24               | 1                | 0              | -3.038659               | 1.563821  | -1.076405 |

### Total atomic spin densities:

|    |    |           |
|----|----|-----------|
| 1  | Al | -0.015643 |
| 2  | N  | 0.104898  |
| 3  | N  | 0.104896  |
| 4  | H  | -0.000449 |
| 5  | C  | 0.455941  |
| 6  | C  | 0.455931  |
| 7  | C  | -0.004244 |
| 8  | C  | -0.004246 |
| 9  | C  | -0.182120 |
| 10 | C  | -0.029344 |
| 11 | C  | -0.029314 |
| 12 | H  | 0.004056  |
| 13 | H  | 0.014675  |
| 14 | H  | -0.000733 |
| 15 | H  | 0.004053  |
| 16 | H  | 0.014681  |
| 17 | H  | -0.000733 |
| 18 | H  | 0.007619  |
| 19 | H  | 0.000434  |
| 20 | H  | 0.017952  |
| 21 | H  | 0.031650  |

Supplementary Material for Chemical Communications  
This journal is © The Royal Society of Chemistry 2005

22 H 0.000434  
23 H 0.017948  
24 H 0.031655

N-N= 6.118823330696D+02 E-N=-2.696111015702D+03 KE= 6.243446957909D+02  
1\1\GINC-B010\SP\UB3LYP\Gen\C7H14Al1N2(2)\IMCKENZI\03-Jun-2003\0\#\ UB  
3LYP SCF=TIGHT GEN FORMCHECK=(ALL) POP=(MINIMAL)\Single point of the  
H adduct of the aluminum in the aluminum carbene analogue.\0,2\Al\N,1  
,1.79779618\N,1,1.79779619,2,109.22549758\H,1,1.57196199,2,125.3870791  
1,3,179.99974442,0\C,2,1.42152065,1,117.84557057,3,1.12982242,0\C,3,1.  
42152134,1,117.84537467,2,1.13218039,0\C,2,1.46110943,1,123.11132507,5  
, -176.29872269,0\C,3,1.46110888,1,123.11146185,6, -176.29484537,0\C,5,1  
.40228645,2,121.66745969,1, -2.33621297,0\C,5,1.50637802,2,118.40066802  
,9,177.22110506,0\C,6,1.50637844,3,118.40053673,1,174.88101919,0\H,7,1  
.09740514,2,112.45692136,1, -124.4139814,0\H,7,1.09929175,2,112.3065718  
4,12, -121.91341253,0\H,7,1.09510299,2,109.35085902,12,119.0636246,0\H,  
8,1.09740451,3,112.45705835,1, -124.41795879,0\H,8,1.09929291,3,112.306  
4035,15, -121.91334727,0\H,8,1.09510307,3,109.35087871,15,119.06366349,  
0\H,9,1.08620762,5,114.15808621,2, -178.65333173,0\H,10,1.09262424,5,10  
9.92794678,2,177.42012969,0\H,10,1.09824688,5,112.98640425,19, -119.899  
19713,0\H,10,1.10105246,5,112.49488563,19,119.33650865,0\H,11,1.092624  
37,6,109.92799134,3,177.41930834,0\H,11,1.09824606,6,112.98663912,22, -  
119.89940368,0\H,11,1.10105363,6,112.49454535,22,119.33635545,0\Versi  
on=x86-Linux-G98RevA.11.3\HF=-627.2861544\S2=0.76925\S2-1=0.\S2A=0.750  
121\RMSD=2.731e-09\Dipole=-0.320708,0.0000232, -0.2277785\PG=C01 [X(C7H  
14Al1N2)]\@

## 2-H2

### Cartesian coordinates

| Center Number | Atomic Number | Atomic Type | Coordinates (Angstroms) |           |           |
|---------------|---------------|-------------|-------------------------|-----------|-----------|
|               |               |             | X                       | Y         | Z         |
| 1             | 13            | 0           | 0.269889                | -1.820412 | -0.792241 |
| 2             | 7             | 0           | 1.355990                | -0.371627 | -0.117329 |
| 3             | 7             | 0           | -1.459759               | -0.805061 | 0.067808  |
| 4             | 6             | 0           | 0.996863                | 0.944440  | 0.045458  |
| 5             | 6             | 0           | -0.339801               | 1.373359  | -0.120528 |
| 6             | 6             | 0           | -1.490850               | 0.614175  | -0.253188 |
| 7             | 6             | 0           | 2.053082                | 1.991180  | 0.314027  |
| 8             | 6             | 0           | -2.841188               | 1.192285  | -0.565131 |
| 9             | 6             | 0           | 2.769213                | -0.722716 | 0.051846  |
| 10            | 6             | 0           | -1.526872               | -1.085097 | 1.532499  |
| 11            | 1             | 0           | -2.261730               | -1.259059 | -0.369341 |
| 12            | 1             | 0           | -0.482995               | 2.449389  | -0.174193 |
| 13            | 1             | 0           | 1.597266                | 2.979497  | 0.409430  |
| 14            | 1             | 0           | 2.797430                | 2.041542  | -0.492227 |
| 15            | 1             | 0           | 2.606527                | 1.792231  | 1.240673  |
| 16            | 1             | 0           | -2.770150               | 2.268359  | -0.746305 |
| 17            | 1             | 0           | -3.564384               | 1.037670  | 0.250874  |
| 18            | 1             | 0           | -3.281298               | 0.740667  | -1.467348 |
| 19            | 1             | 0           | 3.434220                | -0.155379 | -0.612154 |
| 20            | 1             | 0           | 2.899265                | -1.785093 | -0.185769 |
| 21            | 1             | 0           | 3.114357                | -0.576697 | 1.084606  |
| 22            | 1             | 0           | -2.428789               | -0.656269 | 1.983148  |
| 23            | 1             | 0           | -0.646146               | -0.651059 | 2.007250  |
| 24            | 1             | 0           | -1.518435               | -2.169386 | 1.687239  |

N-N= 6.111620623265D+02 E-N=-2.691422326123D+03 KE= 6.223130787271D+02  
1\1\GINC-B093\FOpt\UB3LYP\6-31++G(d,p)\C7H14Al1N2(2)\IMCKENZI\19-Mar-2  
003\0\#\ UB3LYP/6-31++G(D,P) OPT FORMCHECK=(ALL) POP=(MINIMAL)\Additi  
on of H to N2 of the aluminum carbene analogue.\0,2\Al,-0.0811879825,  
-0.7538922532,1.8545819373\N,1.2671747225,-0.2765227576,0.5553514664\N  
, -1.5320213731,0.2833174946,0.5969042461\C,1.1107394679,-0.1167852837,  
-0.8002342759\C,-0.167171927,-0.1256213899,-1.4043996557\C,-1.41625816  
11,-0.0822349787,-0.8071191576\C,2.3228033354,-0.0237904827,-1.6978320  
936\C,-2.7070295416,-0.2393299769,-1.5582305317\C,2.6310591205,-0.2771  
542457,1.09281275\C,-1.442113338,1.7537126519,0.8379728517\H,-2.437770  
1999,-0.0308204767,0.9452284628\H,-0.1719346092,-0.199441538,-2.488747  
6166\H,2.0189524784,0.0934047173,-2.7406891083\H,2.9544258289,-0.92004  
63361,-1.6312095199\H,2.9621917444,0.8309301337,-1.4423848943\H,-2.518  
1210616,-0.4669601361,-2.6109867011\H,-3.3304262823,0.6676401286,-1.51  
89143148\H,-3.3183100315,-1.0608297123,-1.1542544924\H,3.272194352,-1.  
0409659187,0.6339473038\H,2.5863280899,-0.490874537,2.167205911\H,3.12  
56277173,0.6969302859,0.9761453381\H,-2.2117135953,2.3003484004,0.2817  
967947\H,-0.4567026368,2.0957307696,0.5194820178\H,-1.5575452048,1.945  
2125868,1.9102063241\Version=x86-Linux-G98RevA.11.3\HF=-627.120807\S2  
=0.763335\S2-1=0.\S2A=0.750065\RMSD=6.894e-09\RMSF=1.121e-05\Dipole=-0  
.4318964,0.8540321,-0.8668733\PG=C01 [X(C7H14Al1N2)]\@

Supplementary Material for Chemical Communications  
This journal is © The Royal Society of Chemistry 2005

## 2-H3

### Cartesian coordinates

| Center<br>Number | Atomic<br>Number | Atomic<br>Type | Coordinates (Angstroms) |           |           |
|------------------|------------------|----------------|-------------------------|-----------|-----------|
|                  |                  |                | X                       | Y         | Z         |
| 1                | 13               | 0              | -0.233667               | -1.627847 | -0.024067 |
| 2                | 7                | 0              | 1.312823                | -0.677649 | 0.168413  |
| 3                | 7                | 0              | -1.561766               | -0.452373 | -0.295729 |
| 4                | 6                | 0              | 1.291989                | 0.667833  | -0.263056 |
| 5                | 6                | 0              | 0.149167                | 1.380392  | -0.418030 |
| 6                | 6                | 0              | -1.284273               | 0.986377  | -0.103870 |
| 7                | 6                | 0              | 2.621173                | 1.298433  | -0.624291 |
| 8                | 6                | 0              | -1.693839               | 1.481213  | 1.304076  |
| 9                | 6                | 0              | 2.569323                | -1.253534 | 0.642473  |
| 10               | 6                | 0              | -2.953026               | -0.763134 | -0.586471 |
| 11               | 1                | 0              | 0.258287                | 2.391625  | -0.800023 |
| 12               | 1                | 0              | -1.917559               | 1.523870  | -0.830357 |
| 13               | 1                | 0              | 2.472945                | 2.325291  | -0.964426 |
| 14               | 1                | 0              | 3.122243                | 0.742600  | -1.426730 |
| 15               | 1                | 0              | 3.308796                | 1.324717  | 0.228793  |
| 16               | 1                | 0              | -1.581187               | 2.569015  | 1.377891  |
| 17               | 1                | 0              | -1.055228               | 1.021375  | 2.065729  |
| 18               | 1                | 0              | -2.737899               | 1.234079  | 1.528214  |
| 19               | 1                | 0              | 2.949329                | -0.736371 | 1.535089  |
| 20               | 1                | 0              | 3.362657                | -1.245685 | -0.116447 |
| 21               | 1                | 0              | 2.400126                | -2.298871 | 0.921113  |
| 22               | 1                | 0              | -3.291216               | -0.255427 | -1.504025 |
| 23               | 1                | 0              | -3.636387               | -0.468697 | 0.224575  |
| 24               | 1                | 0              | -3.077706               | -1.840838 | -0.740297 |

N-N= 6.163211399424D+02 E-N=-2.702528221860D+03 KE= 6.223563545775D+02  
1\1\GINC-B034\FOpt\UB3LYP\6-31++G(d,p)\C7H14Al1N2(2)\IMCKENZI\21-Mar-2  
003\0\#\ UB3LYP/6-31++G(D,P) OPT(TIGHT) FORMCHECK=(ALL) POP=(MINIMAL)\  
\Addition of H to C3 of the aluminum carbene analogue.\0,2\Al,-0.2337  
137753,-1.6278400803,-0.0240674592\N,1.3128034732,-0.6776862339,0.1684  
127017\N,-1.5617792552,-0.4523284291,-0.2957290802\C,1.2920078387,0.66  
77960024,-0.2630560625\C,0.1492060051,1.3803876333,-0.4180295731\C,-1.  
2842449895,0.9864140973,-0.1038697501\C,2.621209872,1.2983578689,-0.62  
42906244\C,-1.6937968534,1.4812613323,1.3040755485\C,2.5692872611,-1.2  
536075084,0.642473062\C,-2.9530477479,-0.763049854,-0.5864707576\H,0.2  
583558839,2.391617374,-0.800022681\H,-1.9175152421,1.5239250448,-0.830  
3568098\H,2.4730114995,2.3252197486,-0.9644259195\H,3.1222645453,0.742  
5110919,-1.4267304523\H,3.3088336163,1.3246224554,0.2287929032\H,-1.58  
11136636,2.5690605595,1.3778911135\H,-1.05519873,1.0214047385,2.065729  
179\H,-2.7378632239,1.2341572423,1.5282142021\H,2.9493079863,-0.736455  
2798,1.535089287\H,3.3626214167,-1.2457816958,-0.116446716\H,2.4000599  
098,-2.2989395829,0.9211134115\H,-3.2912234034,-0.2553331423,-1.504025  
307\H,-3.6364005259,-0.4685927149,0.2245751855\H,-3.077588334,-1.8407  
495854,-0.7402968332\Version=x86-Linux-G98RevA.11.3\HF=-627.1346485\S  
2=0.752361\S2-1=0.\S2A=0.750003\RMSD=3.730e-09\RMSF=8.055e-07\Dipole=0  
.2077388,-0.2494192,0.0420074\PG=C01 [X(C7H14Al1N2)]\@

## H-C4

### Cartesian coordinates

| Center<br>Number | Atomic<br>Number | Atomic<br>Type | Coordinates (Angstroms) |           |           |
|------------------|------------------|----------------|-------------------------|-----------|-----------|
|                  |                  |                | X                       | Y         | Z         |
| 1                | 13               | 0              | 0.000005                | -1.956178 | -0.540029 |
| 2                | 7                | 0              | -1.397311               | -0.553252 | -0.064200 |
| 3                | 7                | 0              | 1.397317                | -0.553246 | -0.064207 |
| 4                | 6                | 0              | -1.217265               | 0.746818  | -0.237413 |
| 5                | 6                | 0              | -0.000003               | 1.128682  | -1.036697 |
| 6                | 6                | 0              | 1.217264                | 0.746824  | -0.237419 |
| 7                | 6                | 0              | -2.129531               | 1.796083  | 0.339185  |
| 8                | 6                | 0              | 2.129516                | 1.796093  | 0.339196  |
| 9                | 6                | 0              | -2.571479               | -1.025522 | 0.671555  |
| 10               | 6                | 0              | 2.571487                | -1.025511 | 0.671549  |
| 11               | 1                | 0              | -0.000004               | 0.553515  | -1.988597 |
| 12               | 1                | 0              | -0.000006               | 2.195262  | -1.271654 |
| 13               | 1                | 0              | -1.751332               | 2.800549  | 0.135547  |
| 14               | 1                | 0              | -3.136925               | 1.724284  | -0.095769 |
| 15               | 1                | 0              | -2.252467               | 1.694409  | 1.425778  |
| 16               | 1                | 0              | 1.751385                | 2.800560  | 0.135435  |
| 17               | 1                | 0              | 2.252322                | 1.694503  | 1.425813  |
| 18               | 1                | 0              | 3.136955                | 1.724210  | -0.095633 |
| 19               | 1                | 0              | -3.506057               | -0.674688 | 0.215377  |
| 20               | 1                | 0              | -2.560417               | -0.701724 | 1.720394  |
| 21               | 1                | 0              | -2.574952               | -2.119753 | 0.658524  |
| 22               | 1                | 0              | 2.560444                | -0.701678 | 1.720377  |
| 23               | 1                | 0              | 3.506065                | -0.674706 | 0.215346  |
| 24               | 1                | 0              | 2.574944                | -2.119743 | 0.658552  |

N-N= 6.127211275696D+02 E-N=-2.694352536209D+03 KE= 6.223172946883D+02  
1\1\GINC-B002\FOpt\UB3LYP\6-31++G(d,p)\C7H14Al1N2(2)\IMCKENZI\15-Apr-2  
003\0\# UB3LYP/6-31++G(D,P) OPT FORMCHECK=(ALL) POP=(MINIMAL)\H addi  
tion to C4 ob the aluminum carbene analogue. (chair conformation)\0,2  
\Al,0.061226729,-1.5512796991,1.306921796\N,1.4129765649,-0.446604358,  
0.2583178065\N,-1.3803619672,-0.5048270687,0.3200771231\C,1.1983728844  
,0.8028982589,-0.1228522941\C,-0.0199869136,1.458275021,0.4708472825\C  
,-1.2350328337,0.7521778176,-0.0690517935\C,2.0741102194,1.5341302725,  
-1.1047061746\C,-2.1829721406,1.4453896128,-1.0106048725\C,2.591531778  
,-1.1584616517,-0.2389869727\C,-2.5490611457,-1.2656115479,-0.12533756  
91\H,0.007041257,1.3334643928,1.5756653284\H,-0.0473467611,2.525234327  
1,0.2392270492\H,1.6701158301,2.5237056115,-1.3305019023\H,3.088009643  
2,1.6715953299,-0.7018487634\H,2.1874906813,0.9904401971,-2.0521662466  
\H,-1.8309847939,2.4507766627,-1.2530023885\H,-2.315223182,0.896645738  
,-1.9526917616\H,-3.1829757847,1.5407441502,-0.5633026386\H,3.52098928  
89,-0.6297554106,0.008397983\H,2.5594240434,-1.302701706,-1.3267348893  
\H,2.6259661836,-2.1468733899,0.2293928855\H,-2.5590760302,-1.40935486  
6,-1.2135787089\H,-3.4878969112,-0.7758691416,0.1633862982\H,-2.521554  
2145,-2.2541825188,0.3431642631\\Version=x86-Linux-G98RevA.11.3\HF=-62  
7.119163\S2=0.757338\S2-1=0.\S2A=0.750039\RMSD=4.620e-09\RMSF=6.197e-0  
6\Dipole=-0.0633683,1.4588838,-1.4912423\PG=C01 [X(C7H14Al1N2)]\0

## Radical anion (2<sup>-</sup>)

### Cartesian coordinates

| Center<br>Number | Atomic<br>Number | Atomic<br>Type | Coordinates (Angstroms) |           |           |
|------------------|------------------|----------------|-------------------------|-----------|-----------|
|                  |                  |                | X                       | Y         | Z         |
| 1                | 13               | 0              | 0.000000                | 0.000000  | -1.863143 |
| 2                | 7                | 0              | 0.000000                | 1.426770  | -0.572585 |
| 3                | 7                | 0              | 0.000000                | -1.426770 | -0.572585 |
| 4                | 6                | 0              | -0.008818               | 1.268781  | 0.814048  |
| 5                | 6                | 0              | 0.008818                | -1.268781 | 0.814048  |
| 6                | 6                | 0              | -0.161797               | 2.775368  | -1.091617 |
| 7                | 6                | 0              | 0.161797                | -2.775368 | -1.091617 |
| 8                | 6                | 0              | 0.000000                | 0.000000  | 1.413566  |
| 9                | 6                | 0              | 0.180520                | 2.478009  | 1.702325  |
| 10               | 6                | 0              | -0.180520               | -2.478009 | 1.702325  |
| 11               | 1                | 0              | 0.617961                | 3.474683  | -0.750452 |
| 12               | 1                | 0              | -1.139949               | 3.226196  | -0.829618 |
| 13               | 1                | 0              | -0.110051               | 2.735969  | -2.186859 |
| 14               | 1                | 0              | -0.617961               | -3.474683 | -0.750452 |
| 15               | 1                | 0              | 1.139949                | -3.226196 | -0.829618 |
| 16               | 1                | 0              | 0.110051                | -2.735969 | -2.186859 |
| 17               | 1                | 0              | 0.000000                | 0.000000  | 2.501659  |
| 18               | 1                | 0              | 0.058753                | 2.197197  | 2.753660  |
| 19               | 1                | 0              | -0.528571               | 3.287642  | 1.491394  |
| 20               | 1                | 0              | 1.193153                | 2.920933  | 1.600343  |
| 21               | 1                | 0              | -0.058753               | -2.197197 | 2.753660  |
| 22               | 1                | 0              | 0.528571                | -3.287642 | 1.491394  |
| 23               | 1                | 0              | -1.193153               | -2.920933 | 1.600343  |

### Total atomic spin densities:

|    |    |           |
|----|----|-----------|
| 1  | Al | -0.008576 |
| 2  | N  | 0.134494  |
| 3  | N  | 0.134494  |
| 4  | C  | 0.235083  |
| 5  | C  | 0.235083  |
| 6  | C  | 0.008086  |
| 7  | C  | 0.008086  |
| 8  | C  | -0.168356 |
| 9  | C  | 0.193534  |
| 10 | C  | 0.193534  |
| 11 | H  | -0.016796 |
| 12 | H  | 0.037133  |
| 13 | H  | -0.000752 |
| 14 | H  | -0.016796 |
| 15 | H  | 0.037133  |
| 16 | H  | -0.000752 |
| 17 | H  | 0.006001  |
| 18 | H  | -0.021323 |
| 19 | H  | -0.030836 |
| 20 | H  | 0.046845  |
| 21 | H  | -0.021323 |

Supplementary Material for Chemical Communications  
This journal is © The Royal Society of Chemistry 2005

22 H -0.030836  
23 H 0.046845

```
1\1\GINC-B091\SP\UB3LYP\Gen\C7H13Al1N2(1-,2)\IMCKENZI\02-Jun-2003\0\#\#
UB3LYP SCF=TIGHT GEN FORMCHECK=(ALL) POP=(MINIMAL)\Radical anion of
the aluminum carbene analogue.\-1,2\Al\N,1,1.92385377\N,1,1.92385377,
2,95.73935489\C,2,1.39563289,1,125.62941768,3,-0.44536742,0\C,3,1.3956
3288,1,125.62942099,2,-0.44536745,0\C,2,1.45405949,1,116.63981419,4,-1
72.40346706,0\C,3,1.45405942,1,116.63981596,5,-172.40346004,0\C,4,1.40
331908,2,121.78740526,1,0.90734447,0\C,4,1.51232145,2,119.48964357,8,1
70.87544413,0\C,5,1.51232136,3,119.48964108,1,171.78278206,0\H,6,1.101
57082,2,113.54529087,1,-127.5541235,0\H,6,1.10845407,2,113.01917718,11
,-122.18744188,0\H,6,1.0971711,2,108.52830674,11,119.31008,0\H,7,1.101
57082,3,113.545292,1,-127.55417966,0\H,7,1.10845402,3,113.01918111,14,
-122.18743196,0\H,7,1.09717111,3,108.52831313,14,119.31008728,0\H,8,1.
08809356,4,115.29087208,2,179.52111068,0\H,9,1.09498342,4,110.17982979
,2,174.96928859,0\H,9,1.09672527,4,113.35102093,18,-120.61199352,0\H,9
,1.10995801,4,112.29175961,18,119.13737221,0\H,10,1.09498342,5,110.179
83306,3,174.96929094,0\H,10,1.09672521,5,113.35102291,21,-120.61199414
,0\H,10,1.10995805,5,112.29176368,21,119.13737057,0\Version=x86-Linux
-G98RevA.11.3\State=2-A\HF=-626.702426\S2=0.765623\S2-1=0.\S2A=0.75009
4\RMSD=1.967e-09\Dipole=1.4231548,0.,1.2872878\PG=C02 [C2(Al1C1H1),X(C
6H12N2)]\@
```
